# Supplementary material for: A [FeIII(Tp)(CN)3]− scorpionate-based complex as a building block for designing ion storage hosts (Tp: hydrotrispyrazolylborate)
Source: Royal Society of Chemistry journal article supplement (doi:10.1039/c8cc01374h), 2018-01-01
Supplement: c8cc01374h1.pdf [file c8cc01374h1.pdf]

***Supporting information***

**[Fe<sup>III</sup>(Tp)(CN)<sub>3</sub>]<sup>-</sup> Scorpionate Complex as a Building Block for designing Ion-  
Storage Host**

Juan R. Jimenez *et al.*

## Experimental section

### General procedures

Reagents and solvents purchased from commercial sources were used as received. All the reactions were conducted in oven-dried glassware under aerobic conditions.  $(\text{NBu}_4)[\text{Fe}(\text{Tp})(\text{CN})_3]$  was synthesized using the synthesis reported by Lescouëzec *et al.*<sup>1</sup> but using  $\text{Bu}_4\text{NCl}$  as counter ion.

### Synthesis and characterizations of $\{\text{Fe}^{\text{III}}(\text{Tp})(\text{CN})_3\}_2\{\text{Ni}^{\text{II}}(\text{H}_2\text{O})_2\}\cdot 4\text{H}_2\text{O}$ and $\{\text{Fe}^{\text{III}}(\text{Tp})(\text{CN})_3\}_2\{\text{Ni}^{\text{II}}(\text{CH}_3\text{OH})_2\}\cdot \text{CH}_3\text{OH}\cdot 0.5\text{H}_2\text{O}$

To a solution of  $\text{Ni}(\text{NO}_3)_2\cdot 6\text{H}_2\text{O}$  (0.5 mmol, 145 mg) in 100 mL of methanol/water (7/3) was added dropwise a solution of  $(\text{NBu}_4)[\text{Fe}(\text{Tp})(\text{CN})_3]$  (1 mmol, 588 mg) in the same solvent mixture. The resulting solution was stirred for 12 h. A red-orange powder was obtained, which was filtered and dried in air at room temperature. Yield: 68%. Anal. Calcd for  $\text{C}_{24}\text{H}_{32}\text{B}_2\text{Fe}_2\text{N}_{18}\text{NiO}_6$  C 33.49; H 3.74; N 29.29. Found C 33.38; H 3.60; N 29.07.

Crystals of **1** can be obtained *via* single-crystal to single-crystal transformation by drying in air over several days crystals of the parent methanolic compound  $\{\text{Fe}^{\text{III}}(\text{Tp})(\text{CN})_3\}_2\{\text{Ni}^{\text{II}}(\text{CH}_3\text{OH})_2\}\cdot \text{CH}_3\text{OH}\cdot 0.5\text{H}_2\text{O}$  (**1'**, prepared according to You *et al.*<sup>2</sup>).

We have compared the FTIR spectra of **1** in both crystal and powder phases in order to see whether or not there are any remarkable structural changes. The spectra (see Figure S3) exhibit intense cyanide stretching vibrations at  $2164\text{ cm}^{-1}$  and  $2167\text{ cm}^{-1}$  on the powder and crystal phases respectively, characteristic of bridging  $\text{Fe}^{\text{III}}\text{-CN-Ni}^{\text{II}}$ . Both phases show at  $2124\text{ cm}^{-1}$  the stretching characteristic of the terminal  $\text{Fe}^{\text{III}}\text{-CN}$  cyanide ligand. No changes were observed on the absorption bands at  $1492$ ,  $1424$ ,  $1409$ ,  $1386$ ,  $1294$  and  $902\text{ cm}^{-1}$  which are ascribed to the anionic Tp ligand as well as the broad absorption at  $2541\text{ cm}^{-1}$  which is due to the  $\nu(\text{B-H})$  stretching vibration.

### Physical measurements

**Elemental analyses** for C, H, and N were performed on a Perkin-Elmer 240C analyser. **FTIR spectroscopic data** were carried out on a Tensor Bruker instrument working in the ATR mode and collected in the  $400\text{-}4000\text{ cm}^{-1}$  range at room temperature. **X-ray powder diffraction** patterns were collected on a Philips X'pert Pro diffractometer using  $\text{Co-K}\alpha 1$  monochromatic radiation ( $\lambda = 1.78901\text{ \AA}$ ) and equipped with a X'celerator linear detector. The

<sup>1</sup> R. Lescouëzec, F. Lloret, M. Julve, J. Vaissermann, M. Verdagner, *Inorg. Chem.* 2002, **41**, 5943.

<sup>2</sup> H.-R. Wen, C.-F. Wang, Y. Song, S. Gao, J.-L. Zuo, X. You, *Inorg. Chem.* 2006, **45**, 8942

**thermogravimetric analysis** (TGA) experiment was performed under air or N<sub>2</sub> flow up to 600 °C, with a heating rate of 5 K/min. The **X-ray absorption** spectra were measured in the transmission mode at room temperature at BL-9C of Photon Factory.

**Magnetic measurements** on {[Fe(Tp)(CN)<sub>3</sub>]<sub>2</sub>[Ni(H<sub>2</sub>O)<sub>2</sub>]}·4H<sub>2</sub>O were carried out with a SQUID magnetometer in the temperature range 1.9–300 K and under an applied field ranging from 250 to 2500 G. The magnetization measurements were done at 2.0 K in the range 0–7 T. The magnetic susceptibility data were corrected for the diamagnetic contribution of the constituent atoms through the Pascal constants and also for the sample holder.

**Electrochemical measurements** were conducted using the working electrodes which were prepared by mixing {[Fe(Tp)(CN)<sub>3</sub>]<sub>2</sub>[Ni(H<sub>2</sub>O)<sub>2</sub>]}·4H<sub>2</sub>O, acetylene black, and polytetrafluoroethylene (100:30:10) into paste. CR2032-type coin cells were assembled inside an Ar-filled glove box (dew point < -100 °C) with a Li-metal counter electrode, a glass-fiber membrane separator and 1 M LiClO<sub>4</sub> in propylene carbonate electrolyte. The cyclic voltammetry was performed at the sweep rate of 0.2 mV/s between 2.0–4.0 V vs. Li/Li<sup>+</sup>. The open-circuit potentials were recorded by repetition of alternating the galvanostatic charge or discharge at 10 mA/g for 12 min and relaxation for 20 minutes. Galvanostatic charge-discharge curves were measured at a specific current of 12 mA/g between 2.5–4.0 V (vs. Li/Li<sup>+</sup>). **Ex situ XRD** patterns were measured on a RIGAKU Smart Lab diffractometer.

**Single-crystal-XRD** : Frames were collected on a Bruker Kappa APEXII diffractometer at room temperature. Data collection were performed with APEX2 suite (BRUKER). Unit-cell parameters refinement, integration and data reduction were carried out with SAINT program (BRUKER). SADABS (BRUKER) was used for scaling and multi-scan absorption corrections.

An orange single crystal of {Fe<sup>III</sup>(Tp)(CN)<sub>3</sub>]<sub>2</sub>{Ni<sup>II</sup>(CH<sub>3</sub>OH)<sub>2</sub>}·CH<sub>3</sub>OH·0.5H<sub>2</sub>O was mounted onto a glass fiber and placed on the diffractometer. The unit cell parameters found were those previously reported by You *et al.* Then the crystal was removed from the diffractometer and left in air for a few days. Despite an obvious degradation of the crystal quality, there is still diffraction signal after that period, allowing the determination of unit cell parameters fully coherent with the powder XRD measurements (see XRD patterns). A complete data collection was then carried out although the enlarged diffraction peaks and the low crystallographic resolution clearly limit the quality of the dataset.

In the WinGX suite of programs<sup>3</sup>, the structure were solved with SHELXT-14<sup>4</sup> program and refined by full-matrix least-squares methods using SHELXL-14<sup>5</sup>. Non-metallic atoms were

---

<sup>3</sup> L. J. Farrugia, *Journal of Applied Crystallography* **1999**, 32, 837–838.

<sup>4</sup> G. M. Sheldrick, *Acta Crystallographica Section A* **2015**, 71, 3–8.

refined anisotropically while all others were refined isotropically due to the low number of data. Hydrogen atoms of the Tp ligand were placed at calculated positions. The Fourier difference maps do not show the presence of carbon atoms, indicating that MeOH molecules were replaced by water molecules in the crystal structure.

Crystal data for **1**. orange block-like crystals:  $C_{24}H_{34}B_2Fe_2N_{18}NiO_7$ , monoclinic,  $C 2/c$ ,  $a = 28.851(7)$ ,  $b = 9.668(2)$ ,  $c = 13.718(3)$  Å,  $\beta = 101.205(11)^\circ$ ,  $V = 3753.4(16)$  Å<sup>3</sup>,  $Z = 4$ ,  $T = RT$ ,  $\mu = 5.233$  mm<sup>-1</sup>, 5013 reflections measured, 1250 independent ( $R_{int} = 0.0770$ ), 780 observed [ $I \geq 2\sigma(I)$ ], 118 parameters, final R indices  $R_1 [I \geq 2\sigma(I)] = 0.0800$  and  $wR_2$  (all data) = 0.248, GOF on  $F^2 = 1.03$ , max/min residual electron density = 0.69/-0.43 e.Å<sup>-3</sup>.

---

<sup>5</sup> G. M. Sheldrick, *Acta Crystallographica Section C* **2015**, 71, 3–8.

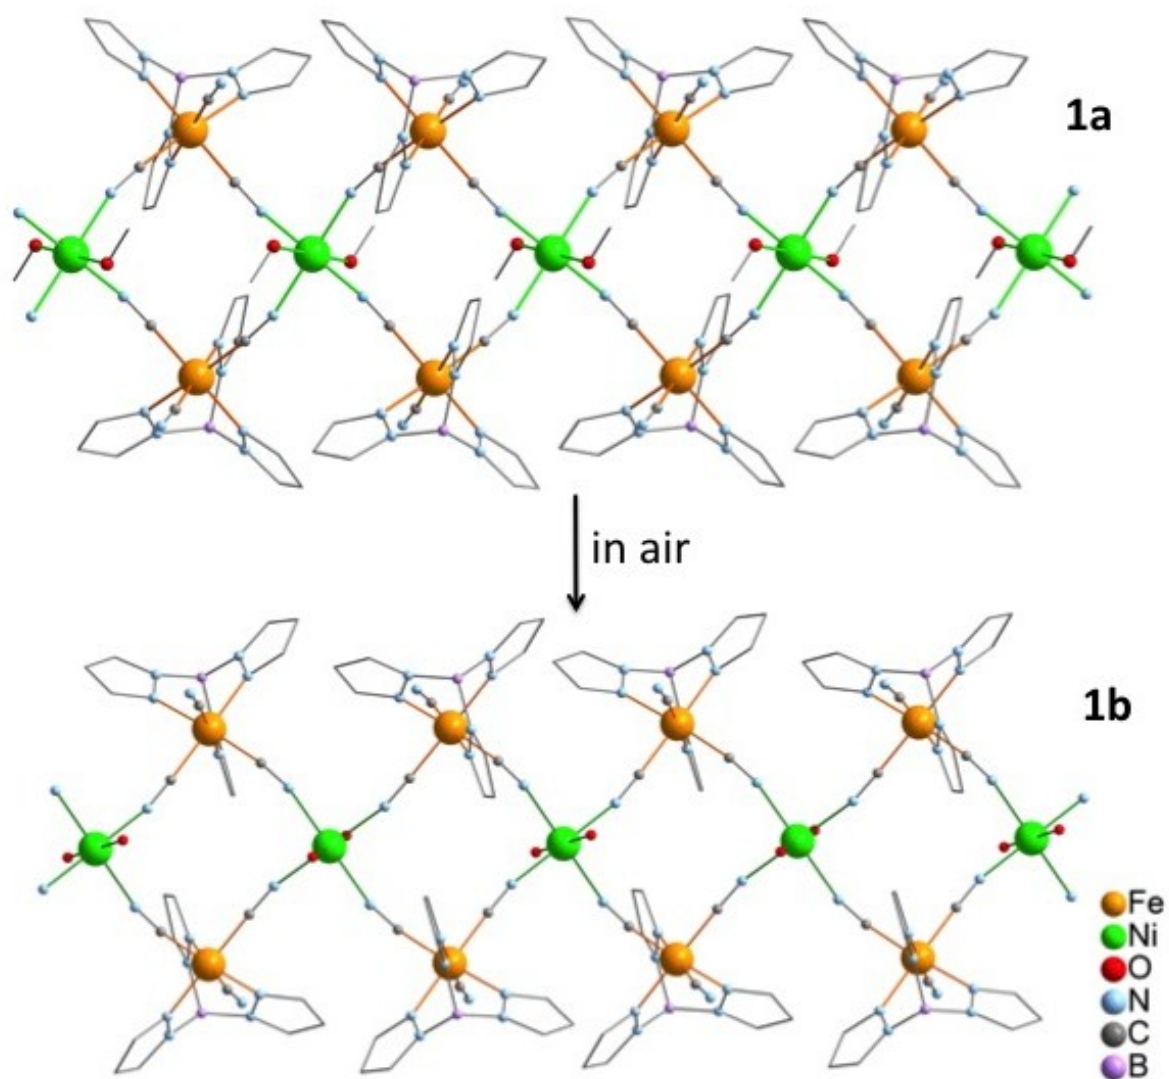

**Figure S1.** Single-crystal to single-crystal phase transition: perspective view of the crystal structure of  $\{[\text{Fe}(\text{Tp})(\text{CN})_3]_2[\text{Ni}(\text{H}_2\text{O})_2]\} \cdot 4\text{H}_2\text{O}$  (**1b**) obtained after leaving  $\{[\text{Fe}(\text{Tp})(\text{CN})_3]_2[\text{Ni}(\text{CH}_3\text{OH})_2]\} \cdot 1.0\text{CH}_3\text{OH} \cdot 0.5\text{H}_2\text{O}$  (**1a**) in air for 3 days.

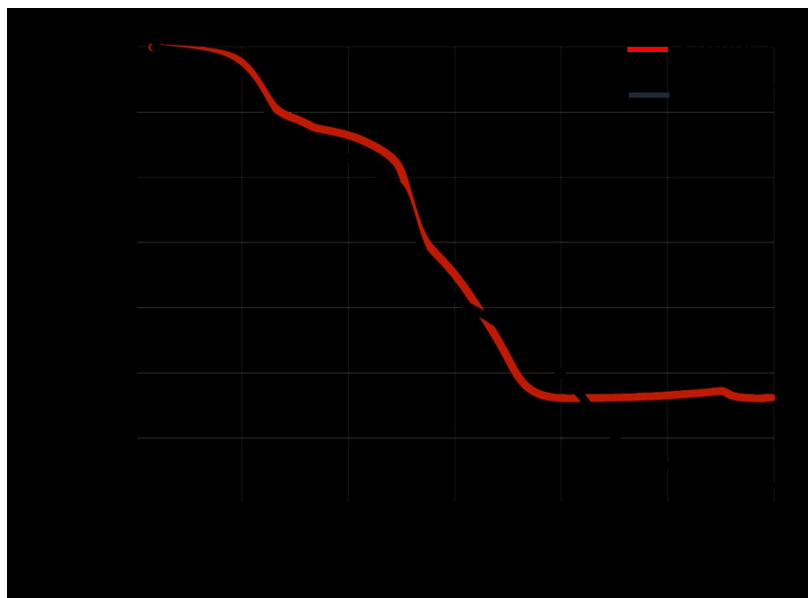

**Figure S2.** TGA of **1** at 2°C/min under N<sub>2</sub> and air flow in the temperature range 25-600°C.

The compound  $\{[\text{Fe}(\text{Tp})(\text{CN})_3]_2[\text{Ni}(\text{H}_2\text{O})_2]\} \cdot 4\text{H}_2\text{O}$  undergoes a weight loss between 90 and 100°C (*ca.* 10%), which corresponds to the removal of 4 H<sub>2</sub>O lattice molecules. The material is stable under N<sub>2</sub> and air atmosphere up to *ca.* 260°C.

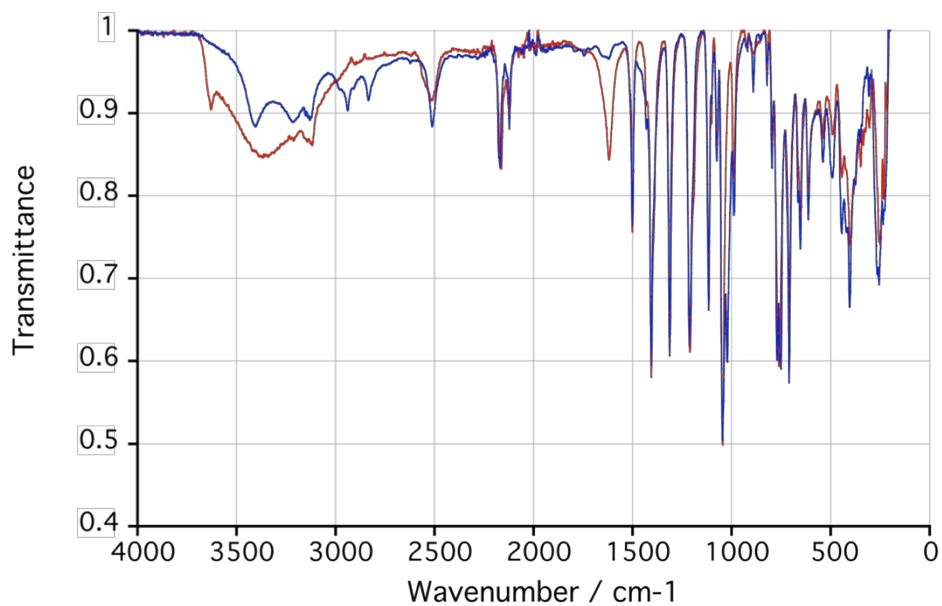

**Figure S3.** (Blue) FT-IR spectra of the single crystals of **1'** (blue) and of the compound **1** (red) which has been air dried for several days.

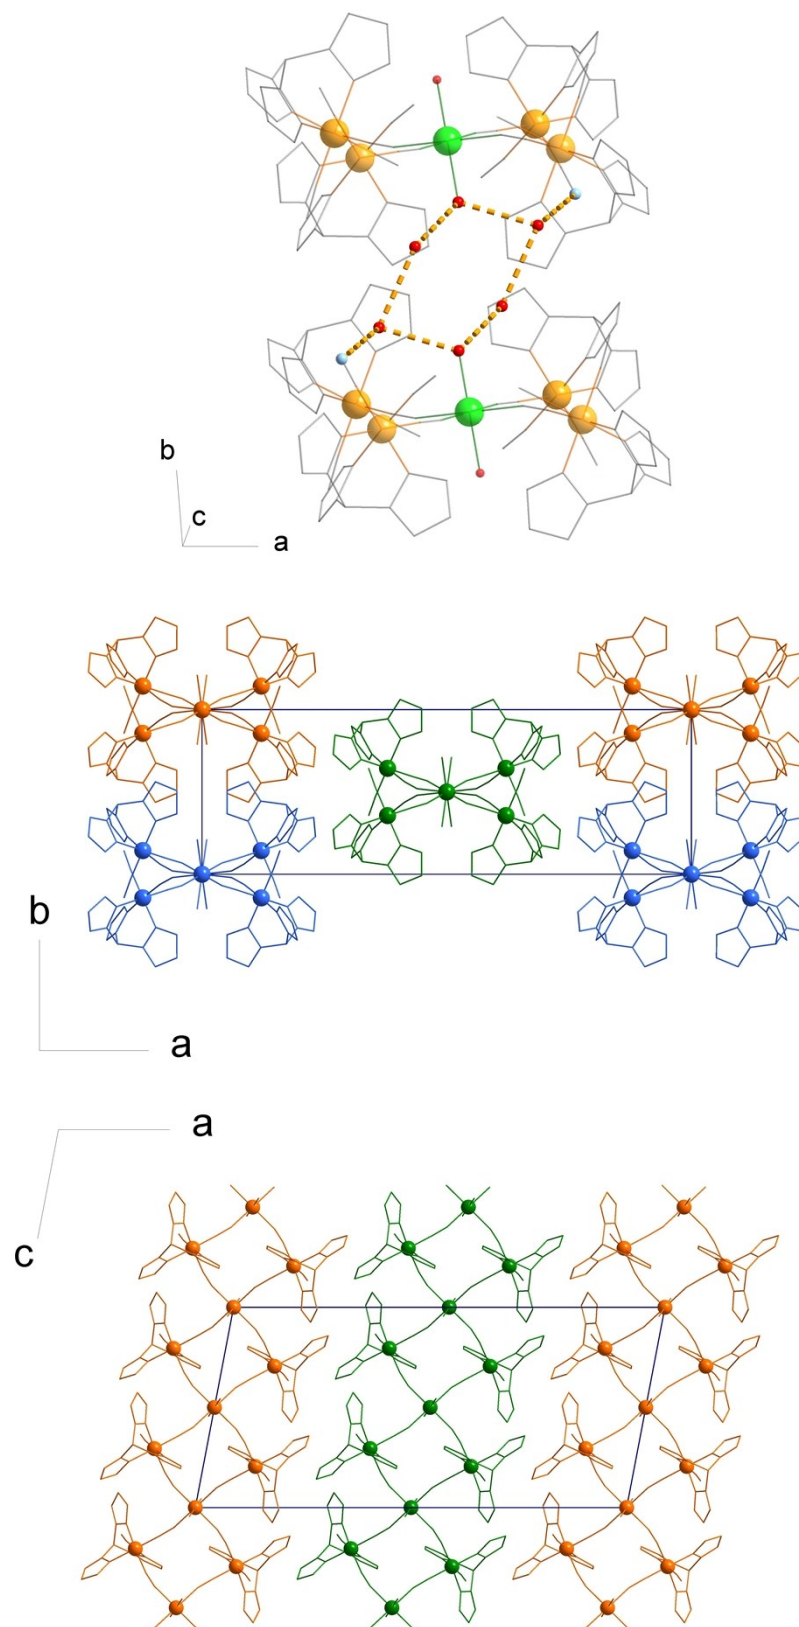

**Figure S4.** Intermolecular interactions in  $\{[\text{Fe}(\text{Tp})(\text{CN})_3]_2[\text{Ni}(\text{H}_2\text{O})_2]\} \cdot 4\text{H}_2\text{O}$ . Top: view of the hydrogen-bond network between adjacent chains (dotted lines are distances inferior to 3.1 Å);<sup>6</sup> Middle and bottom: view of the chains packing in the  $ab$  and  $ac$  planes.

<sup>6</sup> O...O distances: 2.812 (1); 2.967(1), 3.076(1) Å; O...N distance: 3.053(1) Å

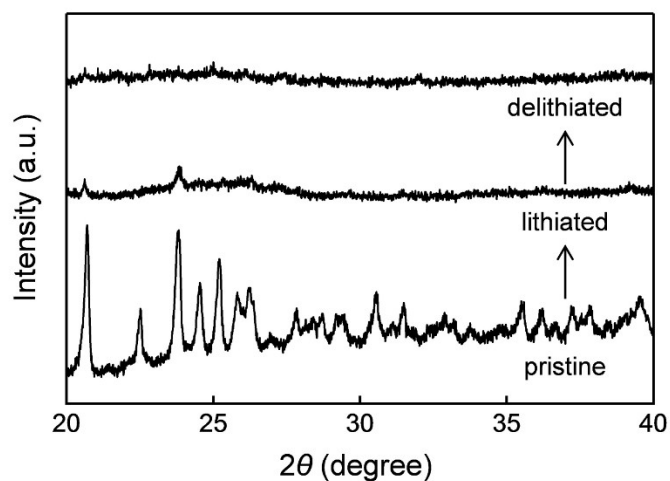

**Figure S5.** *Ex situ* X-ray diffraction patterns for  $\{[\text{Fe}(\text{Tp})(\text{CN})_3]_2[\text{Ni}(\text{H}_2\text{O})_2]\} \cdot 4\text{H}_2\text{O}$  upon (de)lithiation.

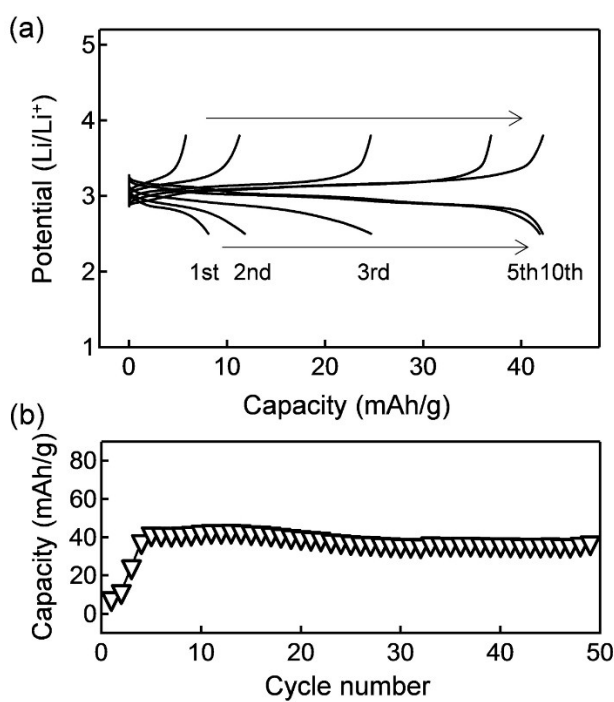

**Figure S6.** (a) Charge-discharge curves and (b) cycle stability of  $\{[\text{Fe}(\text{Tp})(\text{CN})_3]_2[\text{Ni}(\text{H}_2\text{O})_2]\} \cdot 4\text{H}_2\text{O}$  at the specific current of 10 mA/g.



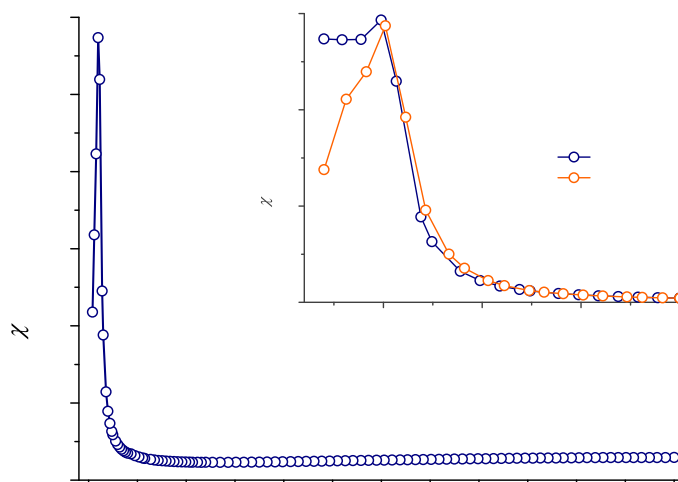

**Figure S7.** Thermal dependence of the  $\chi_M T$  product of **1** in the temperature range 1.9-300 K under magnetic fields of 250 Oe ( $T < 20$  K) and 2500 Oe ( $T > 20$  K). The inset shows the zero-field-cooled and field-cooled magnetization curves ( $H = 250$  Oe).

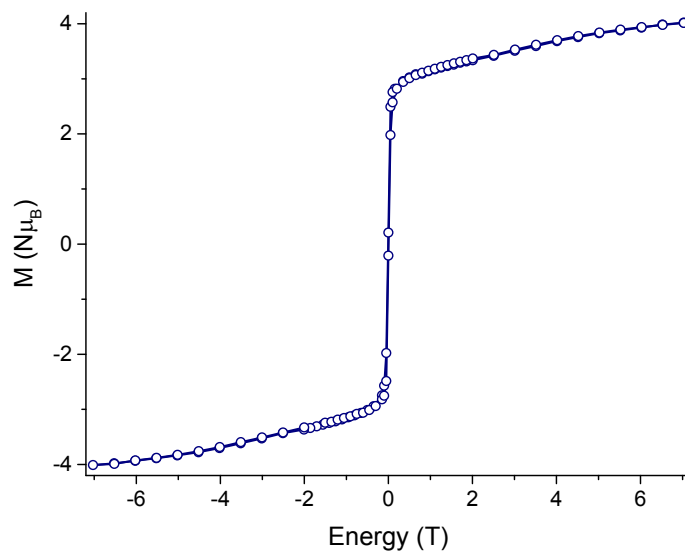

**Figure S8.** Plot of the magnetization *versus* magnetic field measured at 2.0 K: (o) experimental; (—) eye-guideline.

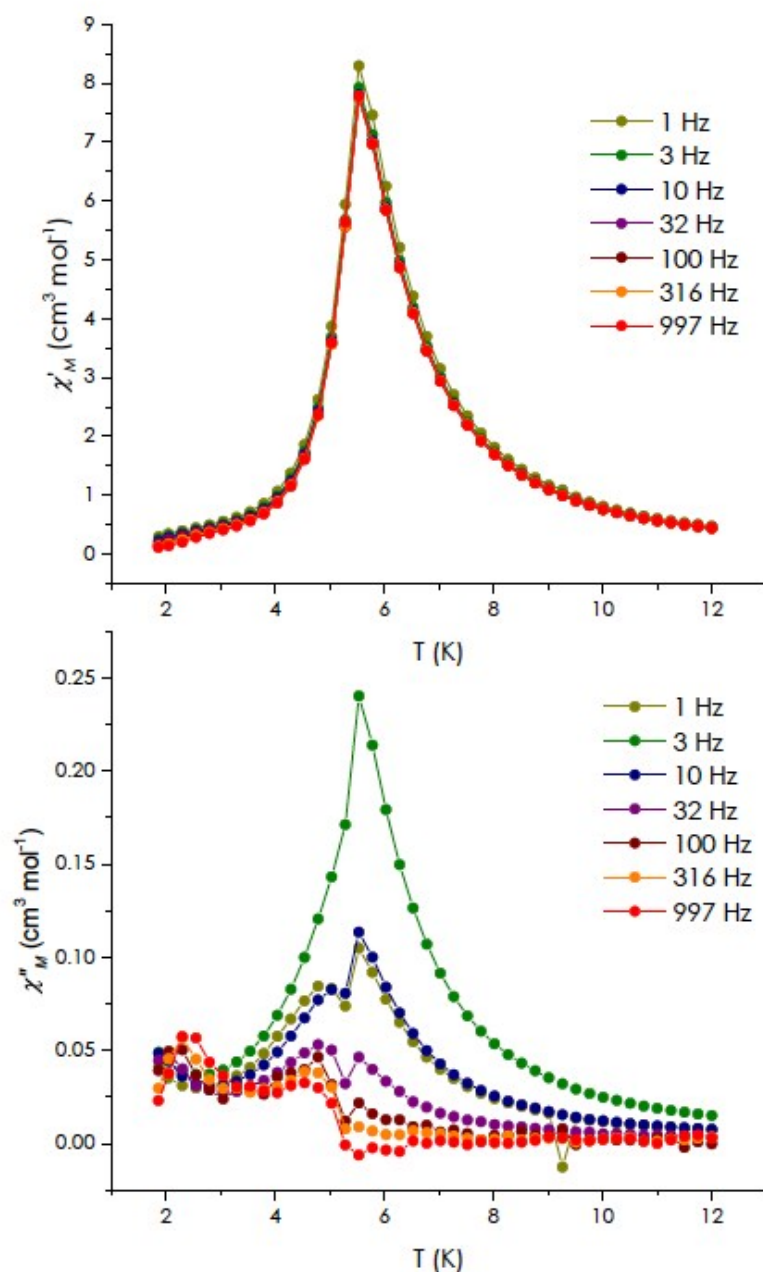

**Figure S9.** In-phase (top) and out-of-phase susceptibility measurements on **1** ( $H_{ac} = 3$  Oe,  $H_{dc} = 0$  Oe).

The temperature dependence of the  $\chi_M T$  product for **1** [ $\chi_M$  is the magnetic susceptibility per  $\text{Fe}^{\text{III}}_2\text{Ni}^{\text{II}}$  unit] is shown in Fig. S5 above. The  $\chi_M T$  value measured at 300 K,  $2.9 \text{ cm}^3 \text{ mol}^{-1} \text{ K}$ , is coherent with the expected value for the three isolated ions : one octahedral nickel(II) ion ( $S_{\text{Ni}} = 1$ ) and two low-spin  $\text{Fe}^{\text{III}}$  centers ( $S=1/2$ ) exhibiting a significant orbital contribution arising from the  ${}^2T_{2g}$  ground term.<sup>7</sup> Upon cooling, the  $\chi_M T$  value decreases smoothly and reaches a broad minimum near 65 K, with  $\chi_M T = 2.3 \text{ cm}^3 \text{ mol}^{-1} \text{ K}$ . Below this temperature, the  $\chi_M T$  value

[7] R. Lescouëzec, J. Vaissermann, F. Lloret, M. Julve, M. Verdaguer, *Inorg. Chem.*, 2002, **41**, 23, 5943

strongly increases to reach a maxima of  $57.4 \text{ cm}^3 \text{ mol}^{-1} \text{ K}$  at 5 K, and finally it falls down to  $21.8 \text{ cm}^3 \text{ mol}^{-1} \text{ K}$  at 1.9 K. The small decrease from room temperature to 65 K can be explained by the effect of the spin-orbit coupling in the anisotropic  $[\text{Fe}^{\text{III}}(\text{Tp})(\text{CN})_3]^-$  complex. Below 50 K, the strong increase of the  $\chi_M T$  value unambiguously points to the occurrence of a ferromagnetic interaction. Actually ferromagnetic interactions are usually observed in cyanide bridged  $\text{Fe}^{\text{III}}_{\text{LS}}\text{-Ni}^{\text{II}}$  complexes.<sup>8</sup> The ferromagnetic ground state is also confirmed by the magnetization versus field curve (Fig. S6), which increases very sharply at low field, and shows a value of 4.0 BM at 7 T (in agreement with a parallel alignment of the two  $S_{\text{Fe}} = \frac{1}{2}$  and the  $S_{\text{Ni}} = 1$ ). The Field-Cooled and Zero-Field Cooled magnetization (FC-ZFC) curves (Fig. S5, inset) indicates the occurrence of a magnetic ordering at 5 K. This is confirmed by the ac magnetic measurement (Fig. S7), which show that the ac susceptibility exhibits a frequency independent maximum near 5 K. Overall, the magnetic properties of the dehydrated phase are very similar to that observed on fresh crystals of **1'** (reported by Wen *et al.*). The disappearance of the weak metamagnetism in **1** as compared to that observed on the fresh crystals of **1'** is likely associated to the change in the interchain magnetic interaction upon removal of the solvent molecules.

---

[<sup>8</sup>] see for example: (a) L. Toma, L. M. Toma, R. Lescouëzec, D. Armentano, G. De Munno, M. Andruh, J. Cano, F. Lloret, M. Julve, *Dalton Trans.* 2005, 1357 ; (b) L.M. Toma, R. Lescouëzec, S. Uriel, R. Llusar, C. Ruiz-Perez, J. Vaissermann, F. Lloret, M. Julve, *Dalton Trans.* 2007, 3690 ; (c) V. Costa, R. Lescouëzec, J. Vaissermann, P. Herson, Y. Journaux, M. H. Araujo, J. M. Clemente-Juan, F. Lloret, M. Julve, *Inorg. Chim. Acta*, 2008, 3912.

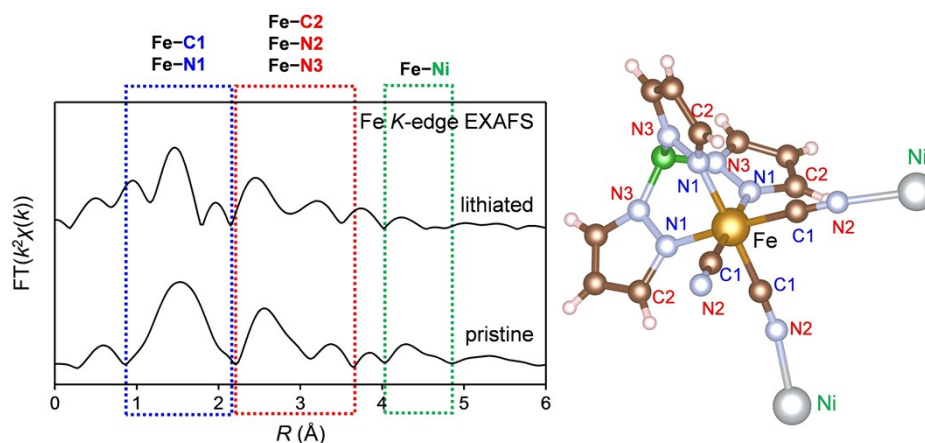

**Figure S10.** Fourier transform magnitudes weighted by  $k^2$  of Fe  $K$ -edge EXAFS before and after  $\text{Li}^+$  intercalation of **1**. The detailed analysis is difficult due to the existence of too many different atoms near the Fe atom. The bending of the cyanide link Fe-CN-Ni can also be affected by the Li intercalation and it can explain the broadening of some features if Fe coordination sites with different distortion coexist in the final amorphous intercalated samples. However this preliminary result shows that the coordination sphere of the Fe is not significantly altered.
